# Supplementary material
Source: PubMed Central journal article supplement (PMC3090270)
Supplement: NIHMS181667-supplement-01.pdf [file NIHMS181667-supplement-01.pdf]

**Structure 18**

## **Supplemental Information**

### **Structure of D-AKAP2:PKA RI Complex:**

### **Insights into AKAP Specificity and Selectivity**

**Ganapathy N. Sarma, Francis S. Kinderman, Choel Kim, Sventja von Daake, Lirong Chen,  
Bi-Cheng Wang, and Susan S. Taylor**

**Figure S1, related to Figure 2**

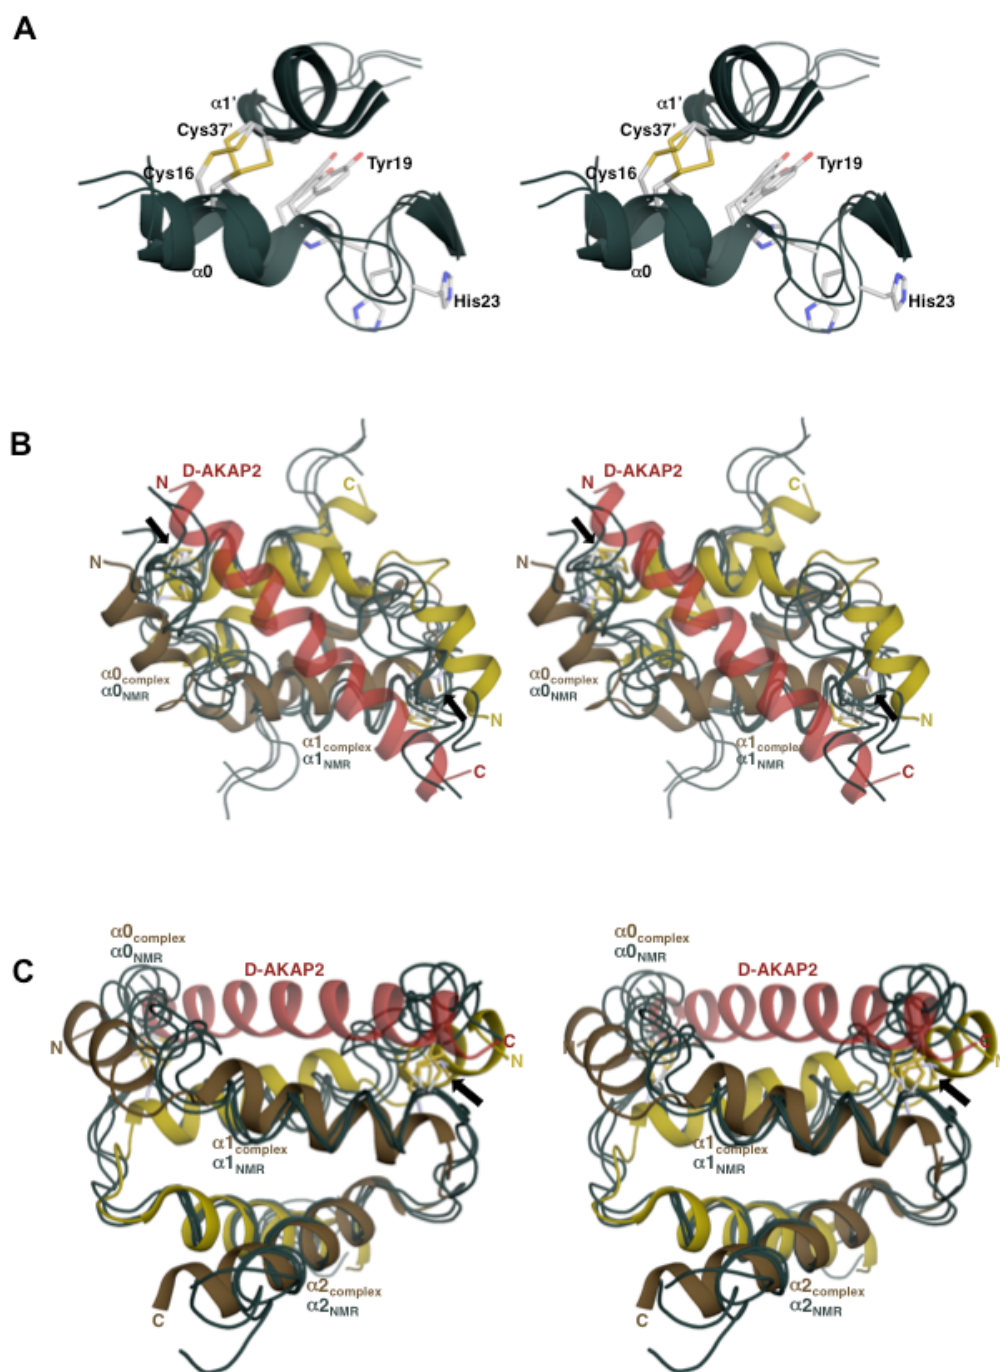

**Figure S1. Variability of the disulfide bonds and the N-termini in the NMR structures**  
(A) Stereo view of the disulfide bond region in the NMR structures highlights the variability in the region. Three representative structures from the ensemble are shown and labeled.  
(B and C) Stereo views of the overlay of the complex structure with apo R1α D/D NMR structures. Three representative structures from the NMR ensemble are shown as ribbons and colored teal. Figure S1C is obtained by a 90° rotation of Figure S1B along the y-axis.

**Figure S2, related to Figure 2**

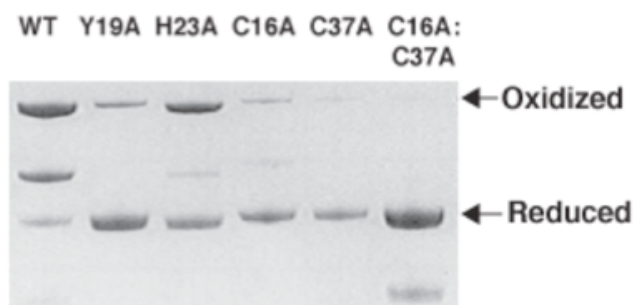

**Figure S2. Mutations affect disulfide bond formation without disrupting dimerization**

Non-reducing, denaturing gels show mutations that disrupt disulfide bond formation. The D/D domain of RI $\alpha$  has two interchain disulfide bonds and therefore, reduction results in proteins that run as monomers on the gel. As expected, Cys to Ala mutants run as monomers.
